# Supplementary material for: Dual stimuli-responsive viologen-containing poly(2-isopropyl-2-oxazoline) and its multi-modal electrochromic phase transition
Source: Royal Society of Chemistry journal article supplement (doi:10.1039/c8py00591e), 2018-01-01
Supplement: c8py00591e1.pdf [file c8py00591e1.pdf]

## Supporting Information

# Dual stimuli-responsive viologen-containing poly(2-isopropyl-2-oxazoline) and its multi-modal electrochromic phase transition

Jaehyuk Nam, Yongseok Jung, Jung Ho Joe, and Woo-Dong Jang\*

Department of Chemistry, Yonsei University

50 Yonsei-ro, Seodaemun-gu, 03722 Seoul, Korea

**Table S1.** Measured molecular weights and dispersity index values determined by analytical SEC and MALDI-TOF-MS.

|                             | $M_{n, \text{theo}}^a$ | $M_{n, \text{SEC}}^b$ | $M_{n, \text{MALDI}}^c$ | PDI ( $M_w/M_n$ ) <sup>d</sup> |
|-----------------------------|------------------------|-----------------------|-------------------------|--------------------------------|
| <b>Me-PiPOx<sup>+</sup></b> | 2278                   | 1970                  | -                       | 1.29                           |
| <b>PiPOx-V</b>              | 4713                   | 4734                  | 4490                    | 1.11                           |

<sup>a</sup> Determined from initiator/monomer/terminator (2/40/1) ratio.

<sup>b</sup> Number-average molecular weight determined by SEC analysis using polystyrene standard.

<sup>c</sup> Determined by MALDI-TOF-MS analysis.

<sup>d</sup> Dispersion indices determined by SEC analysis.

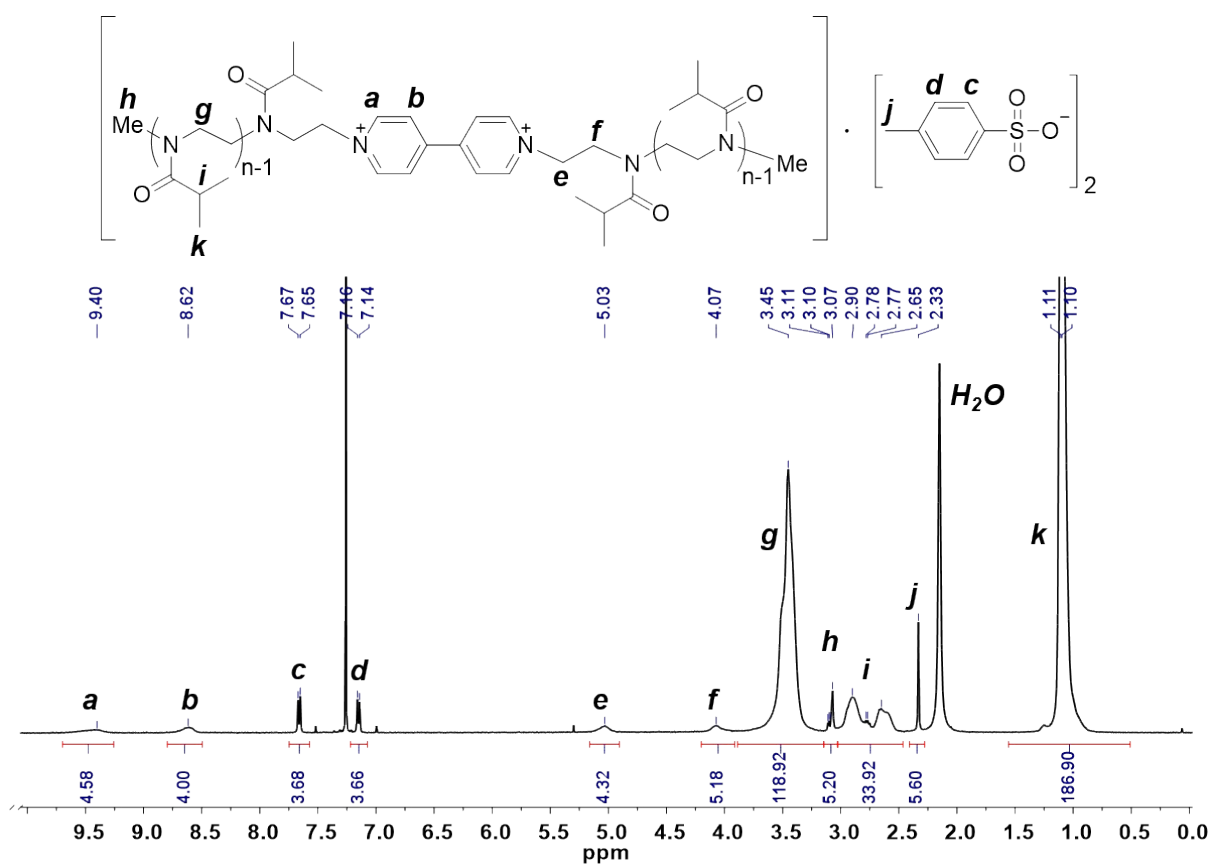

**Figure S1.** <sup>1</sup>H NMR spectrum of **PiPOx-V** in CDCl<sub>3</sub>.

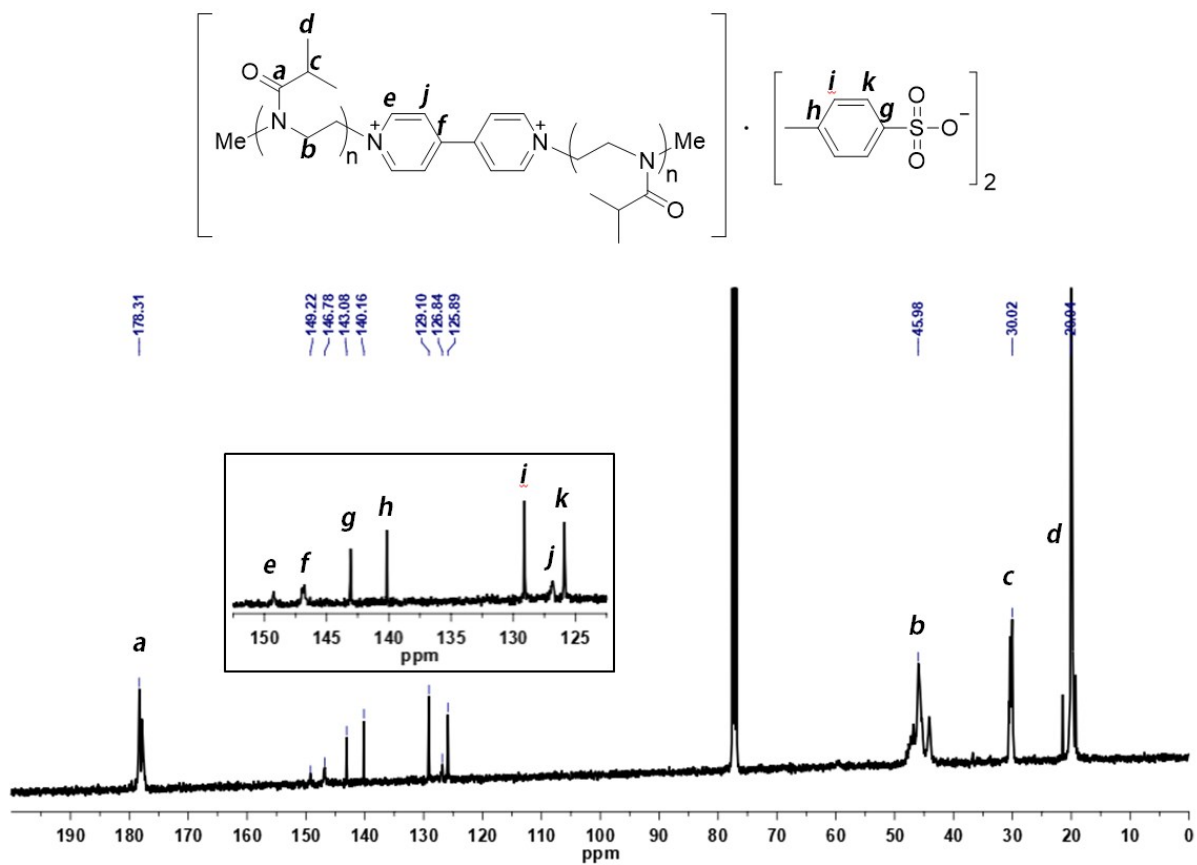

**Figure S2.**  $^{13}\text{C}$  NMR spectrum of **PiPOx-V** in  $\text{CDCl}_3$ .
